# 1 **Exceptional fossil preservation and evolution of the ray-finned fish brain**

2 Rodrigo T. Figueroa<sup>1,2</sup>; Danielle Goodvin<sup>2,3</sup>; Matthew A. Kolmann<sup>2</sup>; Michael I. Coates<sup>4</sup>; Abigail M.

3 Caron<sup>4</sup>; Matt Friedman<sup>\*1,2,5</sup>; Sam Giles<sup>\*5,6</sup>

4 <sup>1</sup>Department of Earth and Environmental Sciences, University of Michigan, 1100 N University Ave, Ann  
5 Arbor, MI 48109, USA

6 <sup>2</sup>Museum of Paleontology, University of Michigan, 1105 N University Ave, Ann Arbor, MI 48109, USA

7 <sup>3</sup>Department of Forestry, Wildlife, and Fisheries, University of Tennessee, 2505 E J. Chapman Dr,  
8 Knoxville, TN 37996, USA

9 <sup>4</sup>Department of Organismal Biology and Anatomy and Committee on Evolutionary Biology, University  
10 of Chicago, 1027 E 57th St, Chicago, IL 60637, USA

11 <sup>5</sup>Department of Earth Sciences, Natural History Museum, Cromwell Road, London SW7 5BD, UK

12 <sup>6</sup>School of Geography Earth and Environmental Sciences, University of Birmingham, Birmingham B15  
13 2TT, UK

14 \*corresponding authors

15

## 16 **SUMMARY**

17 **Brain anatomy provides key evidence for ray-finned fish relationships<sup>1</sup>, but two key**

18 **limitations obscure our understanding of neuroanatomical evolution in this major**

19 **vertebrate group. First, the deepest branching living lineages are separated from the**

20 **group's common ancestor by hundreds of millions of years, with indications that aspects of**

21 **their brain morphology—like other aspects of their anatomy<sup>2,3</sup>—are specialised relative to**  
22 **primitive conditions. Second, there are no direct constraints on brain morphology in the**  
23 **earliest ray-finned fishes beyond the coarse picture provided by cranial endocasts: natural**  
24 **or virtual infillings of void spaces within the skull<sup>4–8</sup>. Here we report brain and cranial**  
25 **nerve soft-tissue preservation in †*Coccocephalichthys wildi*, a ~319-million-year-old (Myr)**  
26 **ray-finned fish. This oldest example of a well-preserved vertebrate brain provides a unique**  
27 **window into neural anatomy deep within ray-finned fish phylogeny. †*Coccocephalichthys***  
28 **indicates a more complicated pattern of brain evolution than suggested by living species**  
29 **alone, highlighting cladistian apomorphies<sup>9</sup> and providing temporal constraints on the**  
30 **origin of traits uniting all extant ray-finned fishes<sup>9–11</sup>. Our findings, along with a growing**  
31 **set of studies in other animal groups<sup>12–16</sup>, point to the significance of ancient soft tissue**  
32 **preservation in understanding the deep evolutionary assembly of major anatomical systems**  
33 **outside of the narrow subset of skeletal tissues<sup>17–20</sup>.**

34

35 MAIN

36 Actinopterygian (ray-finned fish) brains display anatomical innovations not seen in other  
37 vertebrates, most notably a forebrain that grows in a unique way: through eversion of the dorsal  
38 walls of the telencephalon, rather than evagination of its lateral walls<sup>21,22</sup>. This results in a  
39 forebrain formed of two solid hemispheres that do not enclose a ventricle<sup>23</sup>. Brain anatomy  
40 therefore provides important evidence for the monophyly and interrelationships of ray-finned  
41 fishes, a major radiation containing roughly half of all vertebrate species<sup>24</sup>. Brain anatomy in  
42 non-teleost fishes is limited to a handful of examples, reflecting the low diversity of the deepest  
43 extant branches of the ray-finned fish tree of life. Fossils provide limited constraints on brain

44 structure deep in actinopterygian phylogeny. In contrast to teleosts, where the inner walls of the  
45 neurocranium are generally widely separated from most parts of the brain, the contours of the  
46 cranial endocavity (endocast) in non-teleosts appear to capture some aspects of neural anatomy<sup>25</sup>.  
47 For over a century, rare natural endocasts<sup>4,26</sup> and a handful of models from physical  
48 tomography<sup>5,27,28</sup> provided the only constraints on brain structure in early ray-finned fishes. The  
49 recent widespread application of computed tomography yields a greater number of examples  
50 spanning the very deepest branches of the actinopterygian tree<sup>7</sup> to the teleost and holostean  
51 stems<sup>25,29</sup>, and several groups in between<sup>6,30,31</sup>. These provide information on gross morphological  
52 patterns of actinopterygian brain evolution and represent an important source of characters for  
53 phylogenetic analysis<sup>6,26</sup>. However, there are significant disconnects between our understanding  
54 of neural anatomy in fossil species, where information derives exclusively from the endocavity,  
55 and living forms, where only brain anatomy is well documented. This stems from two practical  
56 limitations: the low preservation potential of brain tissues in the fossil record combined with a  
57 poor understanding of endocavity anatomy in living taxa. Consequently, key evolutionary steps  
58 that preceded the origin of living actinopterygian brains remain unknown.

59

60         Although rare, there is a growing record of preserved neural tissue in fossils. Palaeozoic  
61 arthropods provide the most examples<sup>12–16</sup>, although there is a solitary report of a preserved brain  
62 in a Carboniferous cartilaginous fish allied to extant ratfishes<sup>19</sup>. Here we report an exceptionally  
63 preserved brain and associated cranial nerves in the Pennsylvanian (Bashkirian; ~319 Myr) ray-  
64 finned fish †*Coccocephalichthys wildi*, representing the first known fossil example for  
65 actinopterygians. Current analyses place this taxon outside the group containing all living  
66 species<sup>29</sup>. Details of brain structure in †*Coccocephalichthys* therefore bear on interpretations of

67 neural morphology during the early stages of evolution in a principal lineage of backbone  
68 animals. Using  $\mu$ CT of fossil material in concert with diceCT imaging of extant species<sup>32</sup>, we  
69 provide a revised picture of brain evolution in bony fishes.

70

## 71 **Description**

72

73 **Endocast and otoliths.** The endocast of †*Coccocephalichthys*, like that of other Palaeozoic  
74 actinopterygians, is clearly differentiated into areas that appear to correspond to regions of the  
75 brain (Fig. 1a). It agrees most closely with that described for *Lawrenciella*<sup>28,33</sup>. Only a single pair  
76 of otoliths, filling the saccular chamber, are preserved (Fig. 1b,d). These are large and teardrop  
77 shaped in lateral view, similar to those reported in some other Palaeozoic and early Mesozoic  
78 actinopterygians<sup>34</sup>. Their mesial and lateral surfaces are slightly convex and concave,  
79 respectively.

80

81 **Overall preservation of the brain.** Within the cranial cavity lies a symmetrical object that is  
82 denser than the surrounding matrix (Fig. 2, Extended Data Figs. 1–5). It extends from the level of  
83 the orbit to the oticooccipital fissure. It comprises three principal structures: a central, hollow  
84 body that lies on the midline; ramifications on either side of the central body that are in some  
85 cases are clearly associated with endoskeletal nerve foramina; and a diamond-shaped sheet that  
86 lies posterodorsal to the other elements. The central body includes three regions: a long, narrow  
87 anterior extension; a swollen middle region comprising a horizontal plate with two dorsal  
88 hemispheres and a ventral outgrowth; and flattened posterior tube with a slit-like opening on the  
89 dorsal midline. Based on preservational style<sup>19</sup> and comparison with neural features in extant



90 jawed vertebrates (Fig. 2, Extended Data Fig. 3), we interpret this structure as a preserved brain.  
91 The three regions described above roughly correspond to the forebrain, midbrain and hindbrain,  
92 respectively, and collectively occupy around 5% of the endocranial volume.  
93  
94 **Forebrain.** The forebrain, comprising the olfactory bulbs, telencephalon and diencephalon, lies  
95 anterior to, and is considerably smaller than, the midbrain (Fig. 1). An elongate, slender  
96 extension anterior to the telencephalic body represents the olfactory nerve, but the olfactory  
97 bulbs are difficult to identify. The olfactory nerve extends to the midpoint of the orbit as a single  
98 tract before dividing anteriorly. A dorsal sheet extends into the pineal chamber posterior to the  
99 divergence of the olfactory tract from the telencephalon. This structure may represent the  
100 remnants of the velum transversum. Thin filaments connect the anterior and posterior margins of  
101 this sheet to the inner walls of the endocranial chamber, and paired anterior cerebral veins exit  
102 from its base. The body of the telencephalon is formed by two small, paired swellings separated  
103 by a median septum that is visible most clearly anteriorly and posteriorly (Extended Data Fig. 5).  
104 The swellings are moderately expanded laterally, giving the telencephalon an ellipsoidal profile  
105 in axial section (Fig. 2; Extended Data Fig. 5). Each swelling is hollow and encloses a large  
106 ventricular space, indicating that the forebrain is evaginated as in sarcopterygians and  
107 chondrichthyans<sup>35–37,21</sup>. By contrast, all living ray-finned fishes possess an everted  
108 telencephalon<sup>9,21,38–40</sup> (Fig. 2B). We interpret an additional tissue layer dorsal to the  
109 telencephalon as part of the meningeal tissue of the forebrain.

110         There is no clear boundary dividing the telencephalon and diencephalon. A moderate  
111 expansion posteroventral to the telencephalon corresponds with an ellipsoidal ventricle within  
112 the main body of the brain, indicating the presence of partially developed hypothalamic inferior

113 lobes (Extended Data Fig. 4,5). The lobes are visible in cross-section as small ellipsoid structures  
114 of a slightly denser material than the matrix, but less dense than the external brain wall. The right  
115 lobe is apparent externally on the right side of the brain as a low swelling. A slender and  
116 ventrally elongated hypophysis extends from behind the hypothalamus. It leads to a  
117 differentiated distal portion in contact with the buccohypophysial canal, and a posterior  
118 expansion associated with the saccus vasculosus. The ventricular space within each  
119 hypothalamic inferior lobe is connected with that of the hypophysis (the diencephalic ventricle)  
120 via a narrow canal, named the lateral hypothalamic recess<sup>41</sup>. The morphology of this structure in  
121 †*Coccocephalichthys* is similar to that of *Amia* (Extended Data Fig. 6).

122

123 **Midbrain.** The mesencephalic lobes, the dorsal surfaces of which comprise the optic tectum, are  
124 well-developed and oval in dorsal view (Fig. 1). The lobes are connected posteriorly, level with  
125 the cerebellar region, and diverge anteriorly. Two nerves emerge from the surface of the  
126 mesencephalon: a narrow, anterodorsally directed trochlear (IV) nerve; and a stout,  
127 anteroventrally directed oculomotor (III) nerve, which dichotomises within the braincase wall  
128 and enters the orbital cavity through two foramina. A third feature, which leaves the anterior  
129 margin of the midbrain, is of unclear identity. The optic chiasma is preserved on the  
130 anteroventral surface of the mesencephalon, along with the proximal portions of the optic (II)  
131 nerves. These extend and diverge beyond the external margin of the midline optic foramen.

132

133 Ventricles are apparent in sections through the midbrain (Fig. 2, Extended Data Figs. 1,2). The  
134 second (mesencephalic) ventricle mirrors the shape of the optic tectum, and is V-shaped in axial  
135 section and U-shaped in horizontal section. There does not appear to be either a torus

136 longitudinalis or torus semicircularis within the second ventricle. Anteriorly, the mesencephalic  
137 ventricles connect to a tube-like ventricle that opens at the roof of the diencephalic region of the  
138 brain. Posteriorly the mesencephalic ventricles contact the fourth ventricle through a narrow  
139 tube-shaped connection.

140

141 **Hindbrain.** Few features of the hindbrain are preserved. The anteriormost portion of the  
142 hindbrain is developed as small rounded cerebellar auricular lobes, which are separated by the  
143 posterior limits of the mesencephalic lobes (Fig. 1). Posterior to these lies the recessus lateralis  
144 of the fourth ventricle, which is continuous with a thin, dorsally-extensive rhombencephalic tela  
145 choroidea. The cerebellar corpus is barely developed. The fourth ventricle is open dorsally. It is  
146 anteroposteriorly elongate and circular in axial section, and lies ventral to the mesencephalic  
147 ventricle (Fig. 2, Extended Data Figs. 1,2). A cerebral aqueduct connecting the second and fourth  
148 ventricles is not apparent. The internal walls of the fourth ventricle lack pronounced ridges, but it  
149 is difficult to say whether this is original or a taphonomic artifact. Two thin, posteroventrally  
150 directed branches of the abducens (VI) nerve leave the ventral surface of the brain level with  
151 posterior margin of the fourth ventricle. More ventrally, an additional branch extends from the  
152 saccular chamber in the direction of the posterior myodome. Due to the position and path of this  
153 branch, we identify it as a distally diverging branch of the abducens nerve.

154

155 The trigeminofacial nucleus and associated nerves are separated from the body of the hindbrain,  
156 and this is presumably a taphonomic artifact (Fig. 1). The trigeminofacial complex on the right  
157 of the specimen appears to be associated with the alar wall of the rhombencephalon, which has  
158 pulled away from the remainder of the hindbrain. Nerve branches located at the front of this

159 complex are enclosed within skeletal canals and can thus be identified most readily by  
160 comparison with endocasts described for Palaeozoic actinopterygians, although we caution that  
161 this nomenclature needs review in comparison to nerve patterns in extant non-teleost  
162 actinopterygians. Two stout nerves emerge anterolaterally from the front of this complex, the  
163 most anterior of which enters the canal identified as that for the trigeminal (V) nerve, and the  
164 more posterior one the lateralis branch of the facial (VIII<sub>lat</sub>) nerve. A third nerve, which leaves  
165 the complex anteroventrally, enters the canal for the main branch of the facial (VII) nerve. More  
166 posteriorly, a series of nerves are associated with the inner ear and otolith, and most likely  
167 correspond to branches of the octavolateralis (VIII) nerve. The anterior branch of the anterior  
168 ramus of the octavolateralis extends some way dorsally into the anterior ampulla, with the  
169 posterior branch of the anterior ramus entering the utriculus. A posteroventral branch contacts  
170 the anterior margin of the otolith within the saccular cavity. Two to three additional rami attach  
171 to the medial margin of the otolith, and further branches may be present posteriorly.

172  
173 A diamond-shaped sheet lies posterodorsal to the preserved portion of the brain, in close  
174 association with the roof of the endocranial cavity (Fig. 1, Extended Data Fig. 3). This structure  
175 is in a similar position to the meninx primitiva, modified to a cisterna spinobulbularis in  
176 *Polypterus*<sup>42,43</sup>, and a myelencephalic gland in other early ray-finned fishes<sup>44</sup>. The dorsal surface  
177 of the tissue sheet bears a medially located opening surrounded by a thin layer of tissue that  
178 extends as a tube toward the posterodorsal fontanelle of the neurocranium. The vagus (X) nerve  
179 lies ventral to this sheet, extending posterolaterally to exit from the braincase via the  
180 oticooccipital fissure. Anterior to the vagus nerve root, the glossopharyngeal nerve extends  
181 laterally towards the endocranial wall.

182

## 183 **Discussion and Conclusions**

184 **Correspondence between brains and endocasts.** It has been widely assumed that there is close  
185 correspondence between brain and endocast shape in early ray-finned fishes<sup>4,6,26,42</sup>. However, the  
186 brain as preserved in †*Coccocephalichthys* does not closely conform to the inner surface of the  
187 endocavity (Fig. 1, Extended Data Fig. 1). It seems likely that the brain has contracted to some  
188 degree during preservation, but the fact that many cranial nerves both connect with the brain  
189 itself and extend out of their neurocranial foramina places a limit on the degree of shrinkage.  
190 There is also a clear positional match between regions of the preserved brain and areas of the  
191 endocavity hypothesised to accommodate them. Living ray-finned fishes show varying degrees  
192 of correspondence between brain and endocast morphology<sup>46,47</sup> (Fig. 3), although in no case does  
193 the brain completely fill the endocavity in a way comparable to lungfishes and some tetrapods<sup>48–</sup>  
194 <sup>51</sup>. This does not invalidate endocasts as sources of characters or information about  
195 neuroanatomy, but stresses that the anatomy of brains and endocavities should not be treated as  
196 interchangeable.

197

198 **Patterns of brain evolution in bony fishes.** The principal lineages of ray-finned fishes show  
199 substantial differences in both brain and endocavity structure (Fig. 3, Extended Data Fig. 3).  
200 Living members of early-diverging groups like cladistians and chondrosteans provide important  
201 clues about primitive brain anatomy in actinopterygians. However, both groups show extreme  
202 morphological specialisations resulting from their long independent evolutionary histories. As a  
203 stem actinopterygian separated from the common ancestor of all living species by tens—rather  
204 than hundreds—of millions of years<sup>3,29,52,53</sup>, †*Coccocephalichthys* provides unique information

205 bearing on primitive brain anatomy in ray-finned fishes and sequences of change within the  
206 group. Most notably, the brain of †*Coccocephalichthys* allows us to clarify neurological  
207 synapomorphies of the ray-finned fish total group (i.e. the living radiation and all closely related  
208 fossil taxa) and crown group (i.e. the living radiation only), summarised in Fig. 3. An everted  
209 forebrain, the principle neuroanatomical feature of ray-finned fishes, is absent in  
210 †*Coccocephalichthys*, indicating that this feature originated in more crownward portions of the  
211 actinopterygian stem. Absence of this feature also nullifies the hypothesis that forebrain eversion  
212 in actinopterygians arose due to developmental constraints associated with small body size in  
213 Devonian members of the group<sup>54,55</sup>.

214

215 The presence of partially developed inferior lobes of the hypothalamus in  
216 †*Coccocephalichthys* challenges the current assumption that the absence of this diencephalic  
217 outgrowth in *Polypterus* represents a primitive condition for crown ray-finned fishes<sup>1,56</sup>.  
218 Presence of this feature in a stem actinopterygian suggests an alternative scenario where it arose  
219 deep on the ray-finned fish stem, and was retained by actinopteran and lost in cladistians, before  
220 developing fully in neopterygians<sup>56</sup>. †*Coccocephalichthys* also provides evidence that the  
221 myelencephalic gland of holosteans and chondrosteans can trace its origins to a feature present in  
222 stem actinopterygians. The myelencephalic gland is a hematopoietic (blood-generating) structure  
223 enclosed within the endocranial cavity of non-teleost actinopteran, where it either overlies  
224 (lepisosteids) or embraces (*Amia*, chondrosteans) the myelencephalon<sup>44,57</sup>. In *Polypterus*, the  
225 meningeal tissue occupying the same region as the myelencephalic gland of other taxa is  
226 differentiated and highly vascularised, and is identified as the cisterna spinobulbaris<sup>42,43</sup>.  
227 †*Coccocephalichthys* bears a similar membranous structure overlying the rhombencephalon at

228 the level of the vagal nerves, which we consider to be homologous to the cisterna spinobulbaris  
229 of *Polypterus*. On this basis, we argue that modified rhombencephalic meningeal tissues are a  
230 general feature of ray-finned fishes, with subsequent modifications in holosteans and  
231 chondrosteans as a well-developed myelencephalic gland.

232

233 The brain of †*Coccocephalichthys* aids in discerning which neuroanatomical features of  
234 deeply-branching crown lineages are primitive versus derived, with implications for patterns of  
235 brain evolution in more nested clades (Fig. 3). These data provide remarkable corroboration that  
236 features of *Polypterus* such as the absence of intraventricular projections and the presence of a  
237 poorly differentiated corpus cerebelli represent primitive actinopterygian conditions. However,  
238 †*Coccocephalichthys* suggests that perhaps the most conspicuous external aspect of  
239 neuroanatomy in *Polypterus* might be apomorphic. Like sarcopterygians, *Polypterus* has an  
240 enlarged telencephalon<sup>9</sup>, in contrast to the small structure in actinopterans<sup>38,39</sup> and  
241 chondrichthyans<sup>35</sup>. Distribution among extant taxa suggests the shared condition in *Polypterus*  
242 and sarcopterygians may be an osteichthyan feature<sup>42</sup> lost in actinopterans. However, the absence  
243 of enlarged telencephalon in †*Coccocephalichthys* makes it more parsimonious to infer the  
244 convergent origin of similar geometries in *Polypterus* and sarcopterygians. At the same time,  
245 †*Coccocephalichthys* suggests that an apparent specialisation of *Polypterus* might in fact be a  
246 more general feature of ray-finned fishes. *Polypterus* is unique among extant jawed vertebrates  
247 in having an invaginated corpus cerebelli, a condition most parsimoniously interpreted as a  
248 specialisation of that lineage<sup>9,11,58</sup>. However, the corpus cerebelli of †*Coccocephalichthys* also  
249 seems to be formed as an invagination of the dorsal surface of the rhombencephalic region of the  
250 brain, matching the arrangement of *Polypterus*. Independent gains within both lineages, or a

251 single gain at the base of actinopterygians followed by a loss in actinopteran, represent equally  
252 parsimonious scenarios. It is not possible to select between these alternatives in the absence of  
253 additional information on brain structure in other early actinopterygians.

254

255 **The utility of fossil brains.** †*Coccocephalichthys* reinforces results from studies of neural  
256 structures in fossil arthropods<sup>12–16</sup> that highlight the importance of fossil brains for patterns of  
257 neuroanatomical evolution in groups with deep evolutionary divergences. Beyond representing  
258 preservational curiosities, fossilised brains provide otherwise inaccessible trait data with  
259 implications for patterns of phylogenetic relationships and character polarity. We anticipate that  
260 preservation of neural tissue in fossil fishes is likely to be more common than widely thought,  
261 with assumptions of non-preservation leading to potentially valuable information being  
262 overlooked. A careful survey of fish material from taphonomically promising horizons has  
263 potential to yield novel anatomical information bearing on the evolution of brain structural  
264 diversity within the principal clade of aquatic vertebrates.

265

## 266 **References**

- 267 1. Nieuwenhuys, R., ten Donkelaar, H. J. & Nicholson, C. The Meaning of It All. in *The Central*  
268 *Nervous System of Vertebrates: Volume 1 / Volume 2 / Volume 3* (eds. Nieuwenhuys, R., ten  
269 Donkelaar, H. J. & Nicholson, C.) 2135–2195 (Springer, 1998). doi:10.1007/978-3-642-18262-4\_24.
- 270 2. Friedman, M. The early evolution of ray-finned fishes. *Palaeontology* **58**, 213–228 (2015).
- 271 3. Giles, S., Xu, G. H., Near, T. J. & Friedman, M. Early members of ‘living fossil’ lineage imply  
272 later origin of modern ray-finned fishes. *Nature* **549**, 265–268 (2017).
- 273 4. Moodie, R. L. A new fish brain from the coal measures of Kansas, with a review of other fossil  
274 brains. *J. Comp. Neurol.* **25**, 135–181 (1915).



- 275 5. Nielsen, E. *Studies on Triassic Fishes: Glaucolepis and Boreosomus. I.* (Reitzel, 1942).
- 276 6. Giles, S. & Friedman, M. Virtual reconstruction of endocast anatomy in early ray-finned fishes  
277 (Osteichthyes, Actinopterygii). *J. Paleontol.* **88**, 636–651 (2014).
- 278 7. Lu, J., Giles, S., Friedman, M., den Blaauwen, J. L. & Zhu, M. The oldest actinopterygian  
279 highlights the cryptic early history of the hyperdiverse ray-finned fishes. *Curr. Biol.* **26**, 1602–1608  
280 (2016).
- 281 8. Edinger, T. Recent Advances in Paleoneurology. *Prog. Brain Res.* **6**, 147–160 (1964).
- 282 9. Nieuwenhuys, R. Brachiopterygian Fishes. in *The Central Nervous System of Vertebrates:*  
283 *Volume 1 / Volume 2 / Volume 3* (eds. Nieuwenhuys, R., ten Donkelaar, H. J. & Nicholson, C.) 655–  
284 699 (Springer, 1998). doi:10.1007/978-3-642-18262-4\_13.
- 285 10. Anzeiger, A. & Page, P. Beitrag zur anatomie des Zentralnervensystems und des geruchsorgans  
286 von *Polypterus bichir*. *Aus Dem Anat. Inst. Univ. Freibg.* 308–324 (1887).
- 287 11. Ikenaga, T. *et al.* Morphological analysis of the cerebellum and its efferent system in a basal  
288 actinopterygian fish, *Polypterus senegalus*. *J. Comp. Neurol.* **530**, 1231–1246 (2022).
- 289 12. Ma, X., Hou, X., Edgecombe, G. D. & Strausfeld, N. J. Complex brain and optic lobes in an early  
290 Cambrian arthropod. (2012) doi:10.1038/nature11495.
- 291 13. Cong, P., Ma, X., Hou, X., Edgecombe, G. D. & Strausfeld, N. J. Brain structure resolves the  
292 segmental affinity of anomalocaridid appendages. (2014) doi:10.1038/nature13486.
- 293 14. Ma, X., Cong, P., Hou, X., Edgecombe, G. D. & Strausfeld, N. J. An exceptionally preserved  
294 arthropod cardiovascular system from the early Cambrian. *Nat. Commun.* **5**, 3560 (2014).
- 295 15. Edgecombe, G. D., Ma, X. & Strausfeld, N. J. Unlocking the early fossil record of the arthropod  
296 central nervous system. *Philos. Trans. R. Soc. B Biol. Sci.* **370**, 20150038 (2015).
- 297 16. Strausfeld, N. J., Ma, X. & Edgecombe, G. D. Fossils and the evolution of the arthropod brain.  
298 *Curr. Biol.* **26**, R989–R1000 (2016).
- 299 17. Johanson, Z. Placoderm branchial and hypobranchial muscles and origins in jawed vertebrates. *J.*  
300 *Vertebr. Paleontol.* **23**, 735–749 (2003).

- 301 18. Trinajstic, K., Marshall, C., Long, J. & Bifield, K. Exceptional preservation of nerve and muscle  
302 tissues in Late Devonian placoderm fish and their evolutionary implications. *Biol. Lett.* **3**, 197–200  
303 (2007).
- 304 19. Pradel, A. *et al.* Skull and brain of a 300-million-year-old chimaeroid fish revealed by  
305 synchrotron holotomography. *Proc. Natl. Acad. Sci. U. S. A.* **106**, 5224–8 (2009).
- 306 20. Maldanis, L. *et al.* Heart fossilization is possible and informs the evolution of cardiac outflow  
307 tract in vertebrates. *eLife* **5**, (2016).
- 308 21. Braford, M. R. Stalking the everted telencephalon: comparisons of forebrain organization in basal  
309 ray-finned fishes and teleosts. *Brain. Behav. Evol.* **74**, 56–76 (2009).
- 310 22. Briscoe, S. D. & Ragsdale, C. W. Evolution of the chordate telencephalon. *Curr. Biol.* **29**, R647–  
311 R662 (2019).
- 312 23. Nieuwenhuys, R. The development and general morphology of the telencephalon of  
313 actinopterygian fishes: synopsis, documentation and commentary. *Brain Struct. Funct.* **215**, 141–157  
314 (2011).
- 315 24. Nelson, J. S., Grande, T. C. & Wilson, M. V. H. *Fishes of the World*. (John Wiley & Sons, 2016).
- 316 25. Giles, S., Rogers, M. & Friedman, M. Bony labyrinth morphology in early neopterygian fishes  
317 (Actinopterygii: Neopterygii). *J. Morphol.* **279**, 426–440 (2018).
- 318 26. Coates, M. I. Endocranial preservation of a Carboniferous actinopterygian from Lancashire, UK,  
319 and the interrelationships of primitive actinopterygians. *Philos. Trans. R. Soc. B Biol. Sci.* **354**, 435–  
320 462 (1999).
- 321 27. Poplin, C. M. Etude de quelques paleoniscides pennsylvaniens du Kansas. *Cah. Paléontol. Ed.*  
322 *CNRS Paris* (1974).
- 323 28. Hamel, M.-H. & Poplin, C. The braincase anatomy of *Lawrenciella schaefferi*, actinopterygian  
324 from the Upper Carboniferous of Kansas (USA). *J. Vertebr. Paleontol.* **28**, 989–1006 (2008).
- 325 29. Latimer, A. E. & Giles, S. A giant dapediid from the Late Triassic of Switzerland and insights  
326 into neopterygian phylogeny. *R. Soc. Open Sci.* **5**, 180497 (2018).

- 327 30. Argyriou, T. *et al.* Internal cranial anatomy of Early Triassic species of †*Saurichthys*  
328 (Actinopterygii: †Saurichthyiformes): implications for the phylogenetic placement of  
329 †saurichthyiforms. *BMC Evol. Biol.* **18**, 161 (2018).
- 330 31. Choo, B., Lu, J., Giles, S., Trinajstić, K. & Long, J. A. A new actinopterygian from the Late  
331 Devonian Gogo Formation, Western Australia. *Pap. Palaeontol.* **5**, 343–363 (2019).
- 332 32. Gignac, P. M. *et al.* Diffusible iodine-based contrast-enhanced computed tomography (diceCT):  
333 an emerging tool for rapid, high-resolution, 3-D imaging of metazoan soft tissues. *J. Anat.* **228**, 889–  
334 909 (2016).
- 335 33. Pradel, A., Maisey, J. G., Mapes, R. H. & Kruta, I. First evidence of an intercalar bone in the  
336 braincase of “palaeonisciform” actinopterygians, with a virtual reconstruction of a new braincase of  
337 *Lawrenciella* Poplin, 1984 from the Carboniferous of Oklahoma. *Geodiversitas* **38**, 489–504 (2016).
- 338 34. Friedman, M. & Giles, S. Actinopterygians: the ray-finned fishes—an explosion of diversity. in  
339 *Evolution of the vertebrate ear: evidence from the fossil record* (eds. Clack, J. A., Fay, R. R. &  
340 Popper, A. N.) 17–49 (Springer International Publishing, 2016). doi:10.1007/978-3-319-46661-3\_2.
- 341 35. Smeets, W. J. A. J. Cartilaginous Fishes. in *The Central Nervous System of Vertebrates: Volume*  
342 *1 / Volume 2 / Volume 3* (eds. Nieuwenhuys, R., ten Donkelaar, H. J. & Nicholson, C.) 551–654  
343 (Springer, 1998). doi:10.1007/978-3-642-18262-4\_12.
- 344 36. Nieuwenhuys, R. Lungfishes. in *The Central Nervous System of Vertebrates: Volume 1 / Volume*  
345 *2 / Volume 3* (eds. Nieuwenhuys, R., ten Donkelaar, H. J. & Nicholson, C.) 939–1006 (Springer,  
346 1998). doi:10.1007/978-3-642-18262-4\_16.
- 347 37. Nieuwenhuys, R. The Coelacanth *Latimeria chalumnae*. in *The Central Nervous System of*  
348 *Vertebrates: Volume 1 / Volume 2 / Volume 3* (eds. Nieuwenhuys, R., ten Donkelaar, H. J. &  
349 Nicholson, C.) 1007–1043 (Springer, 1998). doi:10.1007/978-3-642-18262-4\_17.
- 350 38. Nieuwenhuys, R. Chondrosteian Fishes. in *The Central Nervous System of Vertebrates: Volume 1*  
351 */ Volume 2 / Volume 3* (eds. Nieuwenhuys, R., ten Donkelaar, H. J. & Nicholson, C.) 701–757  
352 (Springer, 1998). doi:10.1007/978-3-642-18262-4\_14.

- 353 39. Meek, J. & Nieuwenhuys, R. Holosteans and Teleosts. in *The Central Nervous System of*  
354 *Vertebrates: Volume 1 / Volume 2 / Volume 3* (eds. Nieuwenhuys, R., ten Donkelaar, H. J. &  
355 Nicholson, C.) 759–937 (Springer, 1998). doi:10.1007/978-3-642-18262-4\_15.
- 356 40. Northcutt, R. G. Forebrain evolution in bony fishes. *Brain Res. Bull.* **75**, 191–205 (2008).
- 357 41. Morona, R., López, J. M., Northcutt, R. G. & González, A. Comparative analysis of the  
358 organization of the cholinergic system in the brains of two Holostean fishes, the Florida gar  
359 *Lepisosteus platyrhincus* and the bowfin *Amia calva*. *Brain. Behav. Evol.* **81**, 109–142 (2013).
- 360 42. Jarvik, E. *Basic structure and evolution of vertebrates*. (Academic Press, 1980).
- 361 43. Bjerring, H. C. Facts and thoughts on piscine phylogeny. in *Evolutionary Biology of Primitive*  
362 *Fishes* (eds. Foreman, R. E., Gorbman, A., Dodd, J. M. & Olsson, R.) 31–57 (Springer US, 1985).  
363 doi:10.1007/978-1-4615-9453-6\_3.
- 364 44. Chandler, A. C. On a lymphoid structure lying over the myelencephalon of *Lepisosteus*. *Univ.*  
365 *Calif. Publ. Zool.* **9**, 85–104 (1911).
- 366 45. Coates, M. I. Actinopterygians from the Namurian of Bearsden, Scotland, with comments on  
367 early actinopterygian neurocrania. *Zool. J. Linn. Soc.* **122**, 27–59 (1998).
- 368 46. Fine, M. L., Horn, M. H. H. & Cox, B. *Acanthonus armatus*, a deep-sea teleost fish with a  
369 minute brain and large ears. *Proc. R. Soc. Lond. B Biol. Sci.* **230**, 257–265 (1987).
- 370 47. Herzog, H., Klein, B. & Ziegler, A. Form and function of the teleost lateral line revealed using  
371 three-dimensional imaging and computational fluid dynamics. *J. R. Soc. Interface* **14**, 20160898  
372 (2017).
- 373 48. Rowe, T. B., Macrini, T. E. & Luo, Z.-X. Fossil evidence on origin of the mammalian brain.  
374 *Science* **332**, 955–957 (2011).
- 375 49. Neubauer, S. Endocasts: possibilities and limitations for the interpretation of human brain  
376 evolution. *Brain. Behav. Evol.* **84**, 117–134 (2014).
- 377 50. Clement, A. M., Nysjö, J., Strand, R. & Ahlberg, P. E. Brain - Endocast relationship in the  
378 Australian lungfish, *Neoceratodus forsteri*, elucidated from tomographic data (Sarcopterygii: Dipnoi).

- 379 *PLoS ONE* **10**, (2015).
- 380 51. Watanabe, A. *et al.* Are endocasts good proxies for brain size and shape in archosaurs throughout  
381 ontogeny? *J. Anat.* **234**, 291–305 (2019).
- 382 52. Figueroa, R. T., Friedman, M. & Gallo, V. Cranial anatomy of the predatory actinopterygian  
383 *Brazilichthys macrognathus* from the Permian (Cisuralian) Pedra de Fogo Formation, Parnaíba Basin,  
384 Brazil. *J. Vertebr. Paleontol.* **39**, e1639722 (2019).
- 385 53. Stack, J. & Gottfried, M. D. A new, exceptionally well-preserved Permian actinopterygian fish  
386 from the Minnekahta Limestone of South Dakota, USA. *J. Syst. Palaeontol.* **19**, 1271–1302 (2021).
- 387 54. Striedter, G. F. & Northcutt, R. G. Head size constrains forebrain development and evolution in  
388 ray-finned fishes. *Evol. Dev.* **8**, 215–222 (2006).
- 389 55. Folgueira, M. *et al.* Morphogenesis underlying the development of the everted teleost  
390 telencephalon. *Neural Develop.* **7**, 212 (2012).
- 391 56. Schmidt, M. Evolution of the hypothalamus and inferior lobe in ray-finned fishes. *Brain. Behav.*  
392 *Evol.* **95**, 302–316 (2020).
- 393 57. van der Horst, C. J. The myelencephalic gland of *Polyodon*, *Acipenser* and *Amia*. *K. Akad. Van*  
394 *Wet. Te Amst. Proc. Sect. Sci.* **28**, 432–442 (1925).
- 395 58. Graña, P., Folgueira, M., Huesa, G., Anadón, R. & Yáñez, J. Immunohistochemical distribution  
396 of calretinin and calbindin (D-28k) in the brain of the cladistian *Polypterus senegalus*. *J. Comp.*  
397 *Neurol.* **521**, 2454–2485 (2013).

398

399 **Figure Legends**

400

401 **Fig. 1: Neurocranium, endocast, otoliths and preserved brain of †*Coccocephalichthys wildi* (MM**

402 **W.12451). a, Neurocranium in left lateral view. b, cutaways of neurocranium in dorsal (top) and left**

403 **lateral (bottom) views showing brain and otoliths *in situ*. c, endocast in left lateral view. d, the brain and**

404 **associated preserved soft tissues in dorsal (top) and lateral (bottom) views, with left otolith removed in**

405 **the latter for clarity. cce, corpus cerebelli; hyp, hypophysis; mes, mesencephalon; ms, myelencephalic**

406 **sheet; tel, telencephalon; I, olfactory nerve; II, optic nerve; III, oculomotor nerve; V, trigeminal nerve; VI,**

407 **abducens nerve; IX, glossopharyngeal nerve; X, vagus nerve. Scale bars = 5 mm. Arrow indicates anterior**

408 **for all panels.**

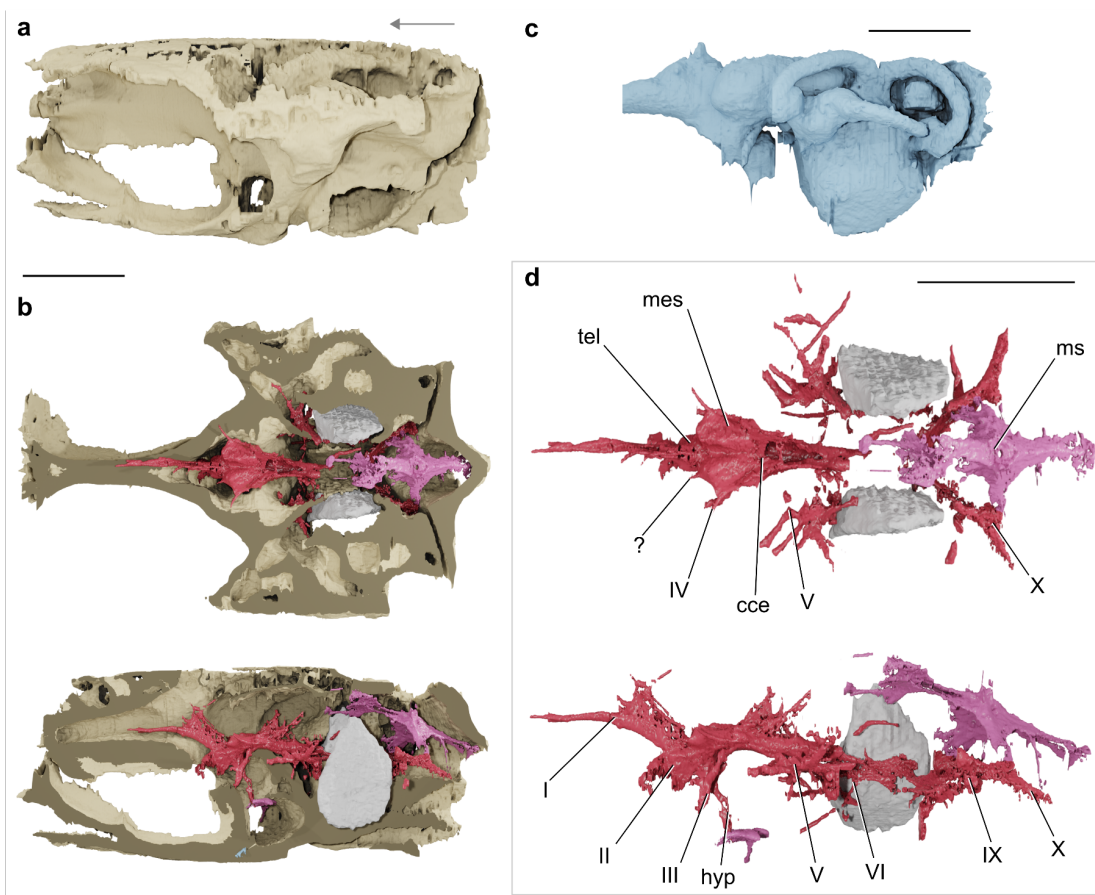

409

410

411 **Fig. 2: Anatomical correspondence between preserved brain of †*Coccocephalichthys wildi* and those**  
412 **of extant fishes. a**, three-dimensional rendering of the brain of †*Coccocephalichthys* in left lateral view.  
413 Scale bar = 10 mm. **b**, transverse sections through the brains of †*Coccocephalichthys* and selected jawed  
414 fishes from diceCT data. cce, corpus cerebelli; mes, mesencephalon; mye, myelencephalon; tel,  
415 telencephalon; tri (V), trigeminal nerve; ?, unidentified midbrain feature. Silhouettes of extant taxa from  
416 phylopic2 (*Squalus*, Ignacio Contreras; *Lepidosiren*, Roberto Diaz Sibaja; *Acipenser*, Maija Karala, *Amia*,  
417 no copyright; *Polypterus*, no copyright). †*Coccocephalichthys* silhouette original based on  
418 ‘*Palaeoniscus*’.<sup>59</sup> Scale bar = 1 mm.



**a**

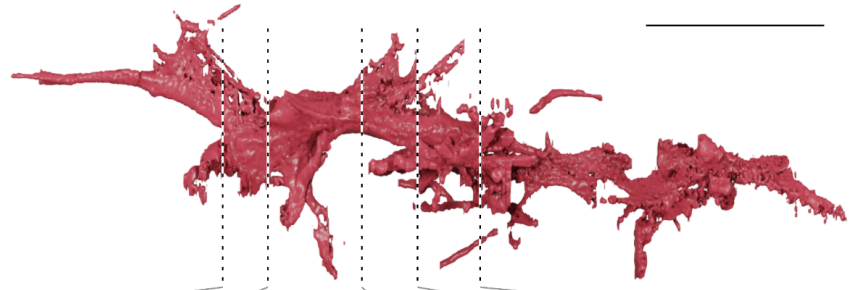

**b**

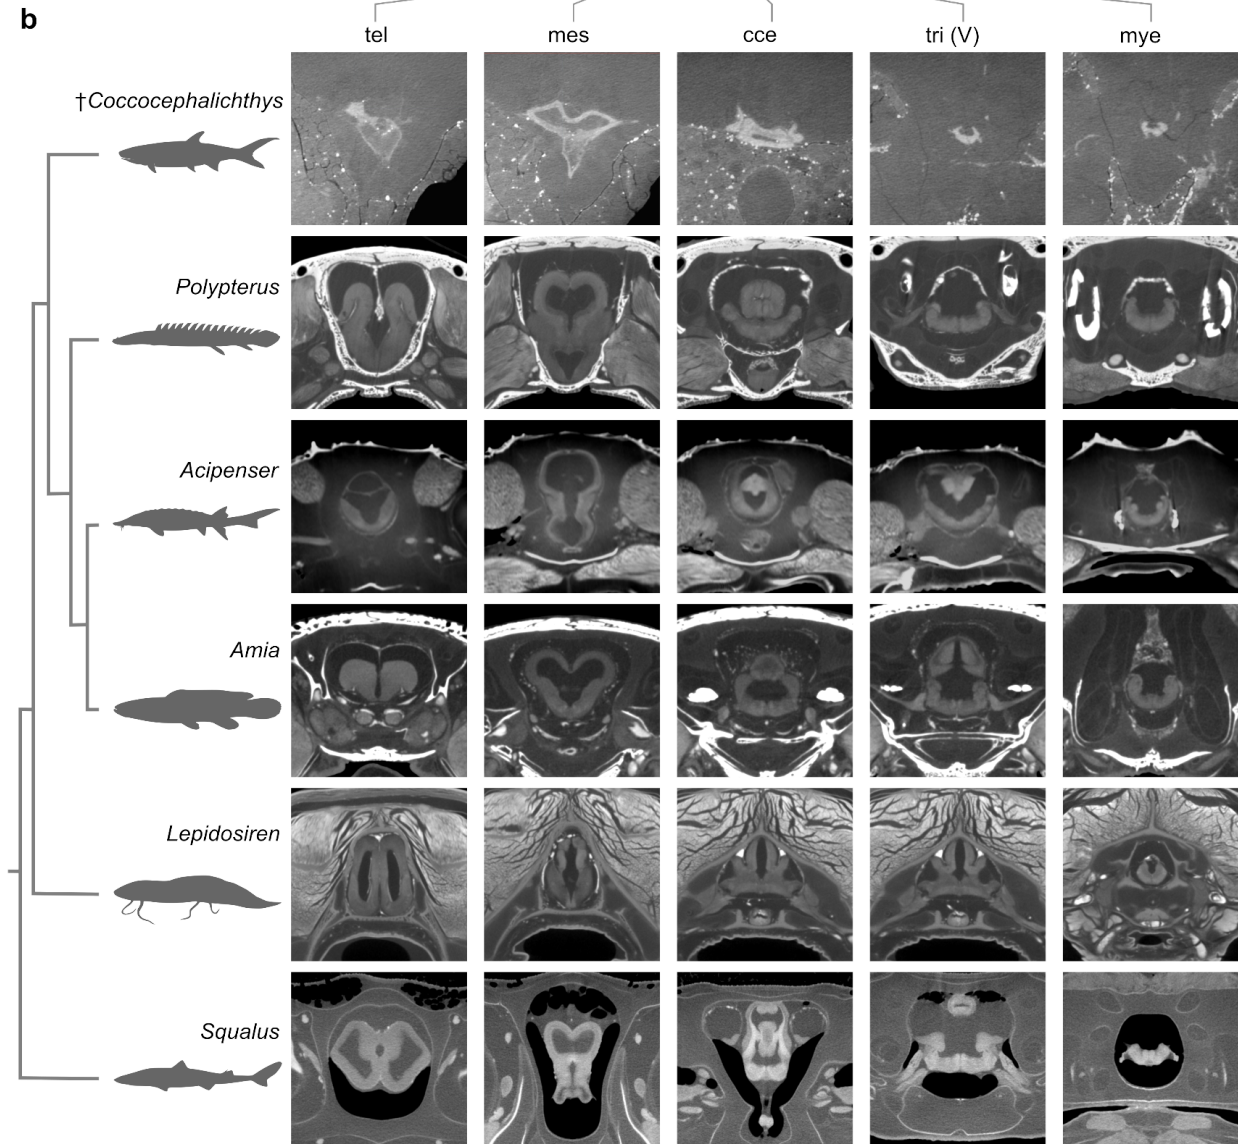

419

420

421

422



423 **Fig. 3: Major anatomical transformations in actinopterygian brain structure illuminated by**  
 424 **†*Coccocephalichthys*.** Branch labels represent character modifications. Asterisk (\*) indicates shift in  
 425 position of character in cladogram due to anatomical information from †*Coccocephalichthys*. Black bars:  
 426 unambiguous changes; grey bars: ACCTRAN optimisations; white bars: DELTRAN optimisations. Blue:  
 427 endocast; red: brain and cranial nerves; pink: myelencephalic sheet. Arrow indicates anterior direction for  
 428 3D renders. Insets show transverse or sagittal sections through the relevant portions of the brain, with  
 429 darker orange shading indicating specific regions of interest. Images not to scale. Node ages from Giles et  
 430 al.<sup>3</sup>

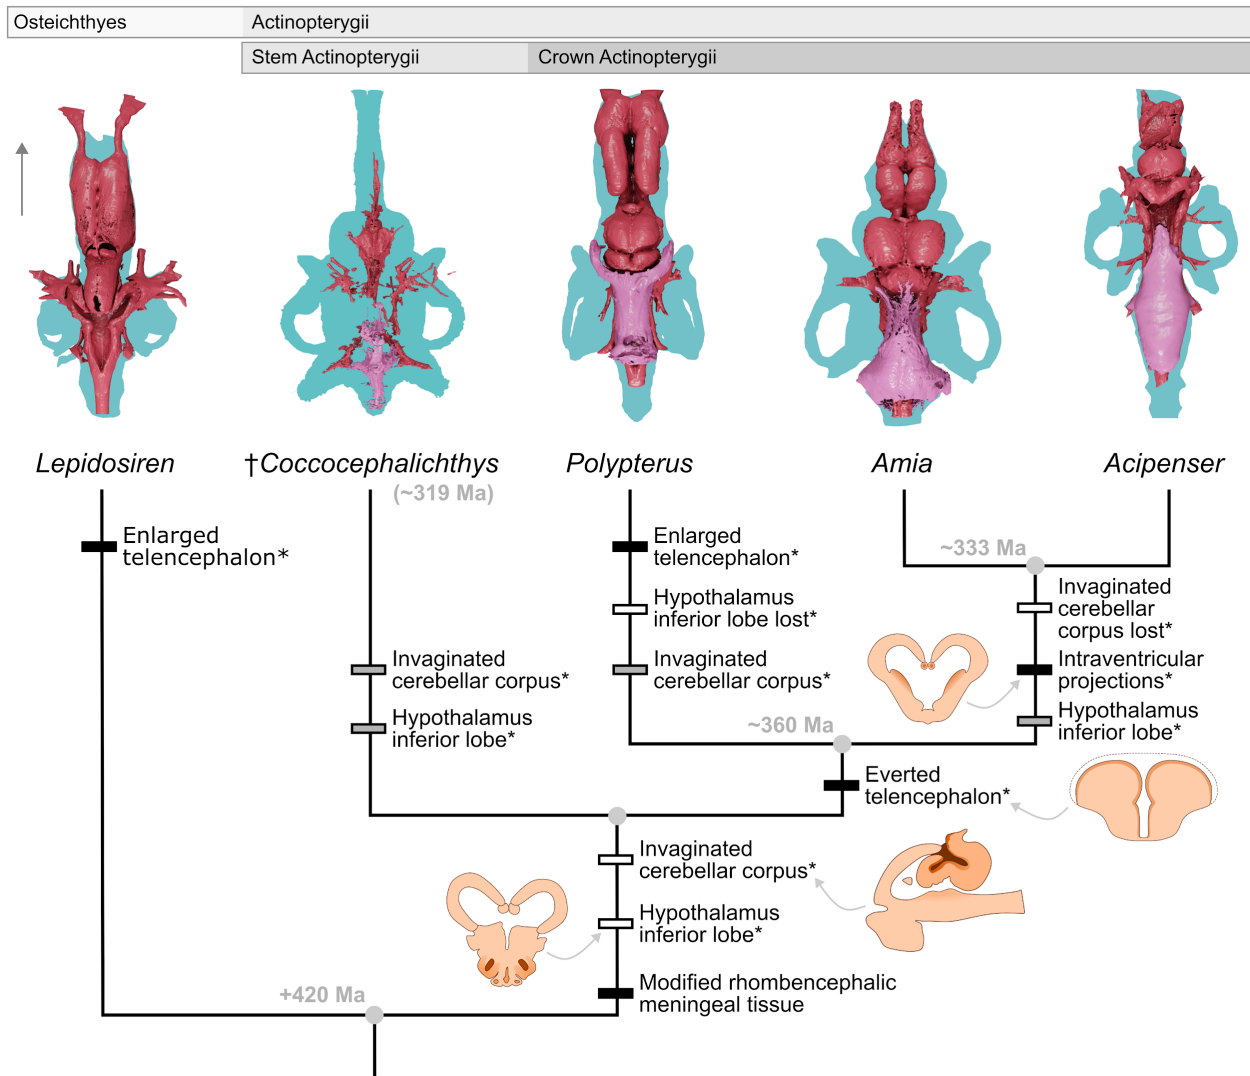

433

## 434 **Methods**

### 435 **Material examined**

436 †*Coccocephalichthys wildi* is known from a single specimen (Manchester Museum, Wild  
437 Collection, 12451) from the roof of the Mountain Fourfoot Mine, Carre Heys, Trawden,  
438 Lancashire, UK. Accounts of its anatomy are given by Watson<sup>60</sup>, Poplin<sup>27</sup>, and Poplin & V éran<sup>61</sup>.  
439 Other three-dimensionally preserved actinopterygians hosted in nodules from this area include  
440 *Trawdenia planti* and *Mesonichthys aitkeni*; these are all thought to derive from the so-called  
441 “Soapstone Bed.” This horizon lies within the Pennine Lower Coal Measures above the Bullion  
442 Coal (= Upper Foot Coal) and the Mountain 1.2 m Coal (= Lower Mountain Coal), but below the  
443 Ardley Seam (=Arley Coal)<sup>26,62,63</sup>. This is within the Langsettian regional substage, which  
444 correlates with the upper part of the Bashkirian stage of the international timescale<sup>64</sup>.

445

### 446 **Diffusible Iodine-based contrast enhancement (diceCT)**

447 Comparative specimens of *Squalus acanthias* (University of Michigan Museum of Zoology  
448 [UMMZ] uncatalogued), *Polypterus senegalus* (UMMZ 195008), *Amia calva* (UMMZ 235291)  
449 and *Acipenser fulvicens* (UMMZ 219456) were prepared for diceCT by submerging specimens in  
450 1.25% Lugol’s solution (25g I<sub>2</sub> + 50g KI for every 2L of water) for roughly 14 days prior to  
451 scanning. DiceCT data for a specimen of *Lepidosiren paradoxa* (UF:FISH:129826) from the  
452 Florida Museum of Natural History Ichthyology Collection was obtained from Morphosource  
453 (ark:/87602/m4/M167969).

454

### 455 **X-ray computed tomography**

456 †*Coccocephalichthys wildi* and extant comparative material were scanned at the CTEES facility  
457 of the Department of Earth and Environmental Sciences, University of Michigan, using a Nikon  
458 XT H 225ST  $\mu$ CT scanner. The scan for †*Coccocephalichthys wildi* was set with 120 kV energy,  
459 125  $\mu$ A current and using a 0.5 mm copper filter. Eight frames were acquired for each projection,  
460 with an exposure time of 2.83 seconds, and the option for minimising ring artifacts was selected.  
461 Effective pixel size was 15.35  $\mu$ m and geometric magnification = 13.031. Parameters for extant  
462 comparative material (*Squalus acanthias*, *Polypterus senegalus*, *Acipenser brevirostrum*, and  
463 *Amia calva*) can be accessed through the Supplemental Material.

464

#### 465 **Methods references**

- 466 59. Lankester, E. R. & Ridewood, W. G. *Guide to the gallery of fishes*. (British Museum (Natural  
467 History). Department of Zoology, 1908).
- 468 60. Watson, D. M. S. The structure of certain palaeoniscids and the relationships of that group with  
469 other bony fish. *Proc. Zool. Soc. Lond.* **95**, 815–870 (1925).
- 470 61. Poplin, C. M. & V eran, M. A revision of the actinopterygian fish *Coccocephalus wildi* from the  
471 Upper Carboniferous of Lancashire. *Spec. Pap. Palaeontol.* **52**, 7–29 (1996).
- 472 62. Coates, M. I. & Tietjen, K. ‘This strange little palaeoniscid’: a new early actinopterygian genus,  
473 and commentary on pectoral fin conditions and function. *Earth Environ. Sci. Trans. R. Soc. Edinb.*  
474 **109**, 15–31 (2018).
- 475 63. Hough, E. *Geology of the Burnley area (SD82NW and SD83SW)*. (2004).
- 476 64. Waters, C. N. *et al.* *A revised correlation of carboniferous rocks in the British Isles*. (Geological  
477 Society of London, 2011). doi:10.1144/SR26.

478

479 **Acknowledgements** We thank David Gelsthorpe and Lindsay Loughtman (Manchester  
480 Museum) for collections access, and Ramon Nagesan and Randall Singer (UMMZ) for  
481 assistance with extant material. Lauren Simonitis and Kayla Hall (Friday Harbor Labs) are  
482 thanked for providing comparative material of *Squalus*. Alessio Capobianco, Jesús Díaz-Cruz,  
483 Carlos Mauricio Peredo provided feedback on an earlier version of this contribution, and Richard  
484 Dearden assisted with Blender. S.G. was supported by a Royal Society Dorothy Hodgkin  
485 Research Fellowship (DH160098). This study includes data produced in the CTEES facility at  
486 University of Michigan, supported by the Department of Earth and Environmental Sciences and  
487 College of Literature, Science, and the Arts.

488

489 **Author contributions** The project was conceived by M.F. and S.G. CT scanning was carried out  
490 by M.F. and R.F., with staining of extant material by R.F. and M.K. Segmentation of CT data  
491 was performed by M.F., S.G., D.G., and R.F. M.F, S.G., and R.F wrote the manuscript, with  
492 comments from all authors.

493

494 **Data availability** The fossil described in this study is deposited in the collections of the  
495 Manchester Museum and the extant specimens in the University of Michigan Museum of  
496 Zoology. The reconstructed .TIFF stack, segmented Mimics file and .PLY files for  
497 †*Coccocephalichthys wildi* are available on Zenodo (10.5281/zenodo.6560305).

498

499

500 **Extended Data figure legends**

501 **Extended Data Fig. 1. Sagittal sections through the neurocranium of †*Coccocephalichthys***

502 ***wildi* showing the brain and associated structures.** cce, corpus cerebelli, cr.c; crista

503 cerebellaris, h.inf, hypothalamus inferior lobes; hyp, hypophysis; mes, mesencephalon; ms,

504 myelencephalic sheet; rho, rhombencephalon; sc, spinal cord; tel, telencephalon; v.tr, velum

505 transversum; 2<sup>nd</sup> v, second ventricle; 4<sup>th</sup> v, fourth ventricle; I, olfactory nerve; II, optic nerve.

506 Scale bar = 10 mm.

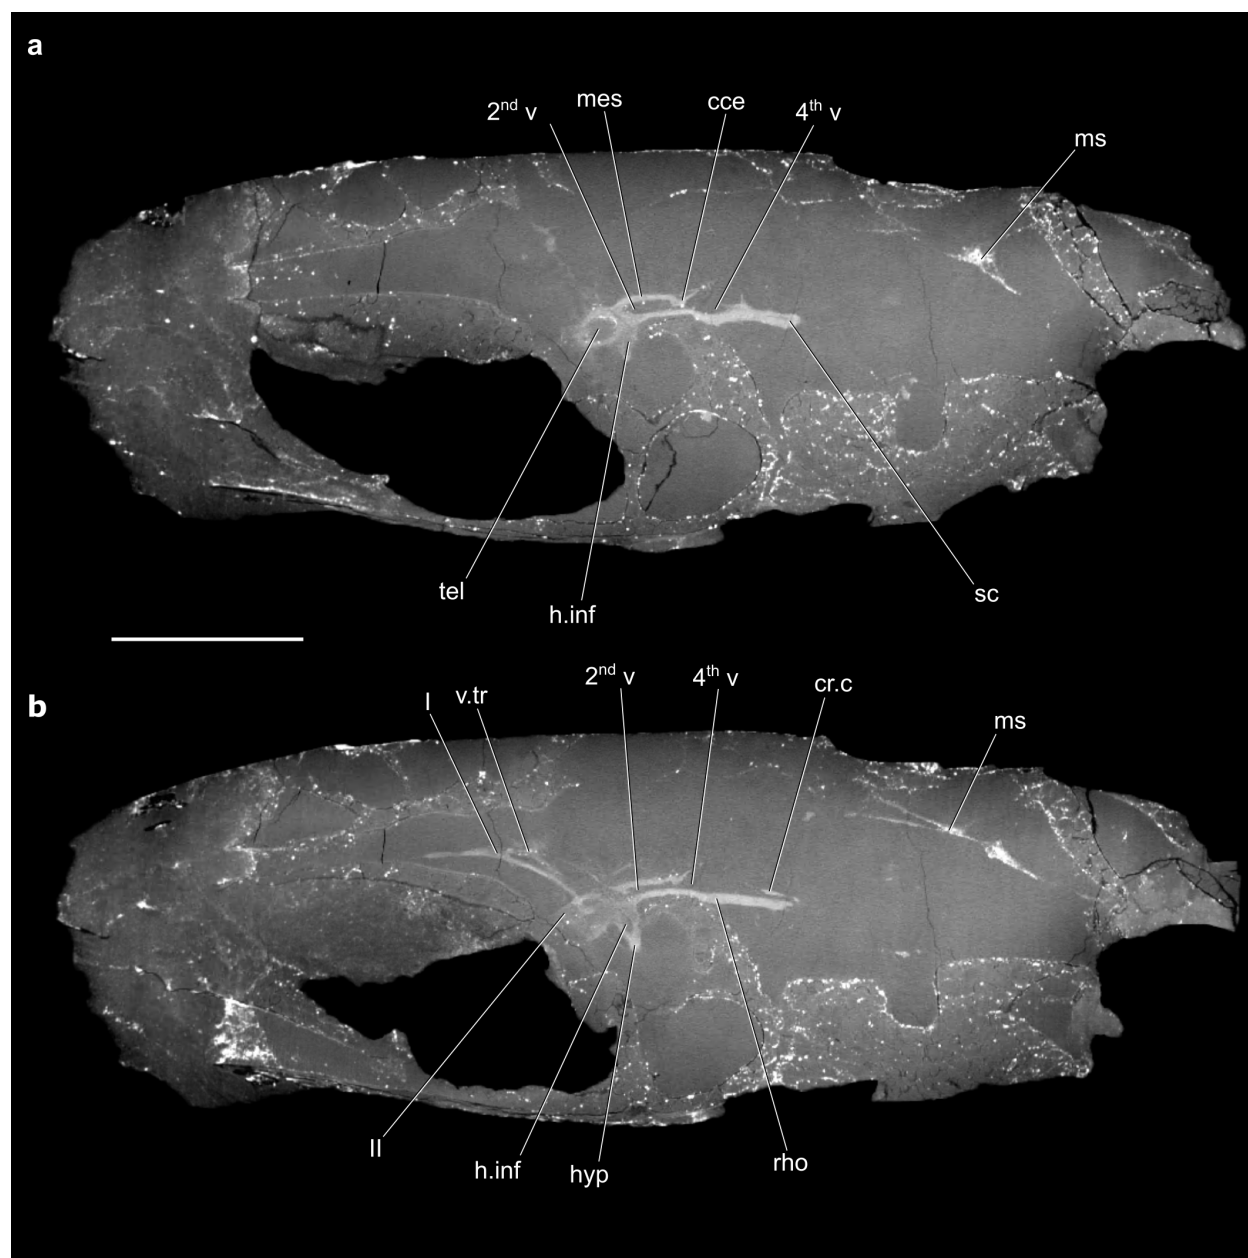

507

508

509

510 **Extended Data Fig. 2. The brain of †*Coccocephalichthys wildi* (red) rendered partially**  
511 **transparent to show brain ventricle configuration (white). a, dorsal view. b, left lateral view.**  
512 die. v, diencephalic ventricle; 2<sup>nd</sup> v, second ventricle; 4<sup>th</sup> v, fourth ventricle. Scale bar = 5 mm.

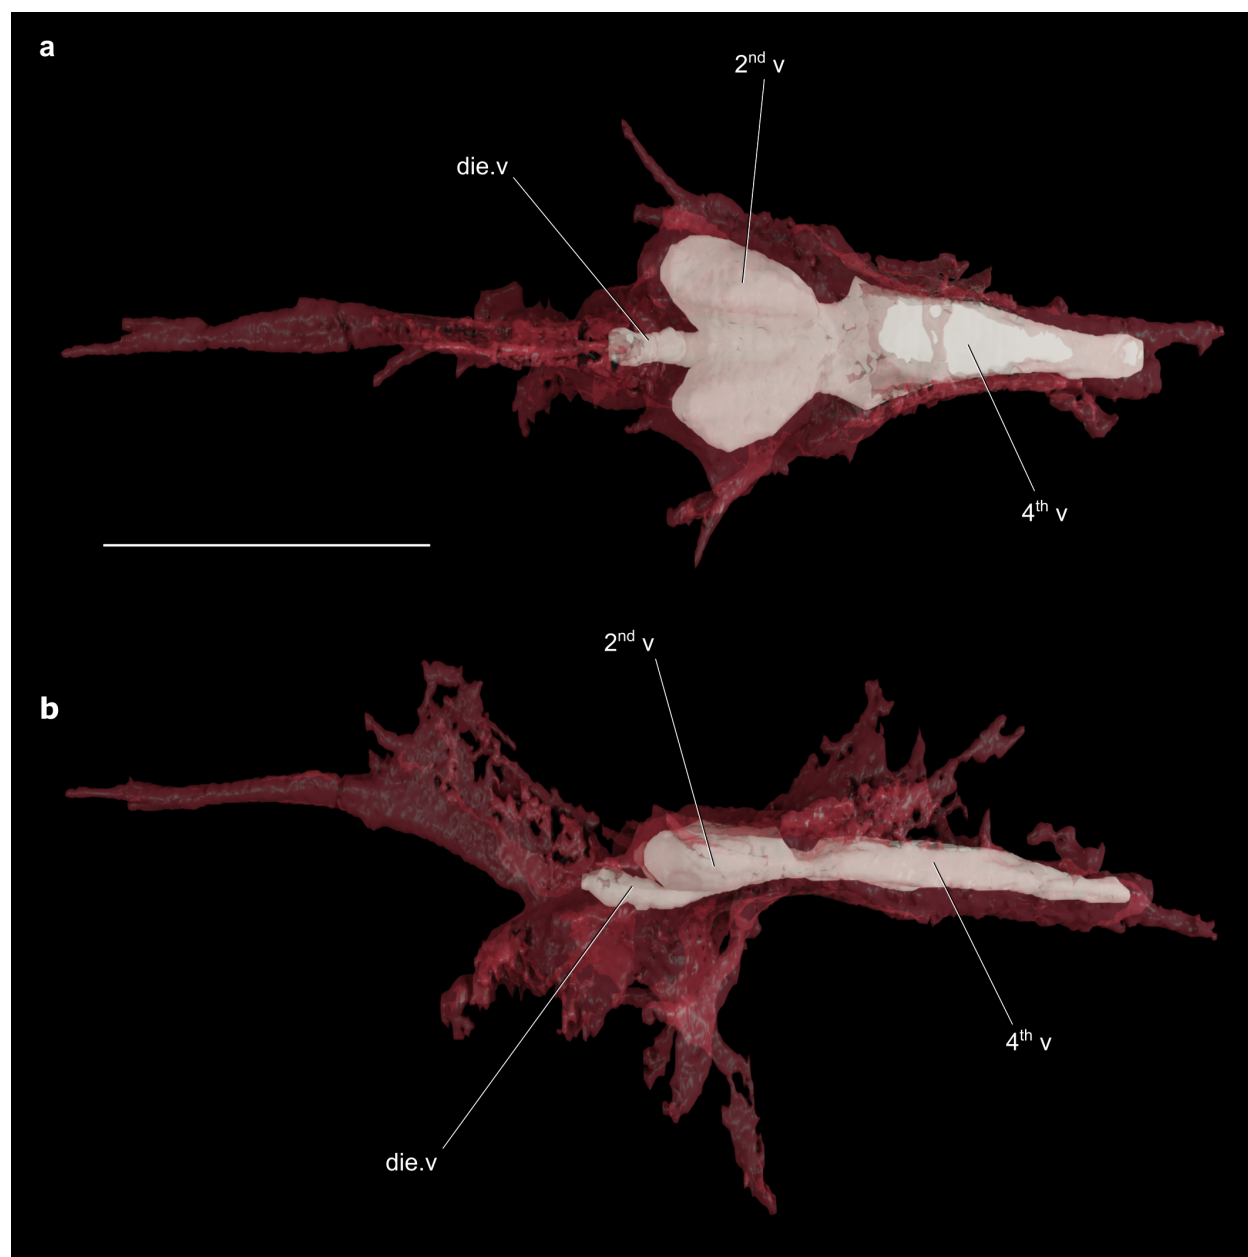

513

514

515



516 **Extended Data Fig. 3. The brain (red) and myelencephalic sheet/gland (pink) of**  
517 **†*Coccocephalichthys wildi* and selected extant ray-finned fishes. a, †*Coccocephalichthys***  
518 ***wildi*. b, *Acipenser brevirostrum*. c, *Amia calva*. d, *Polypterus senegalus*. Gray and white**  
519 **delimitations show margins between forebrain, midbrain and hindbrain across all taxa. Scale bar**  
520 **= 10 mm.**

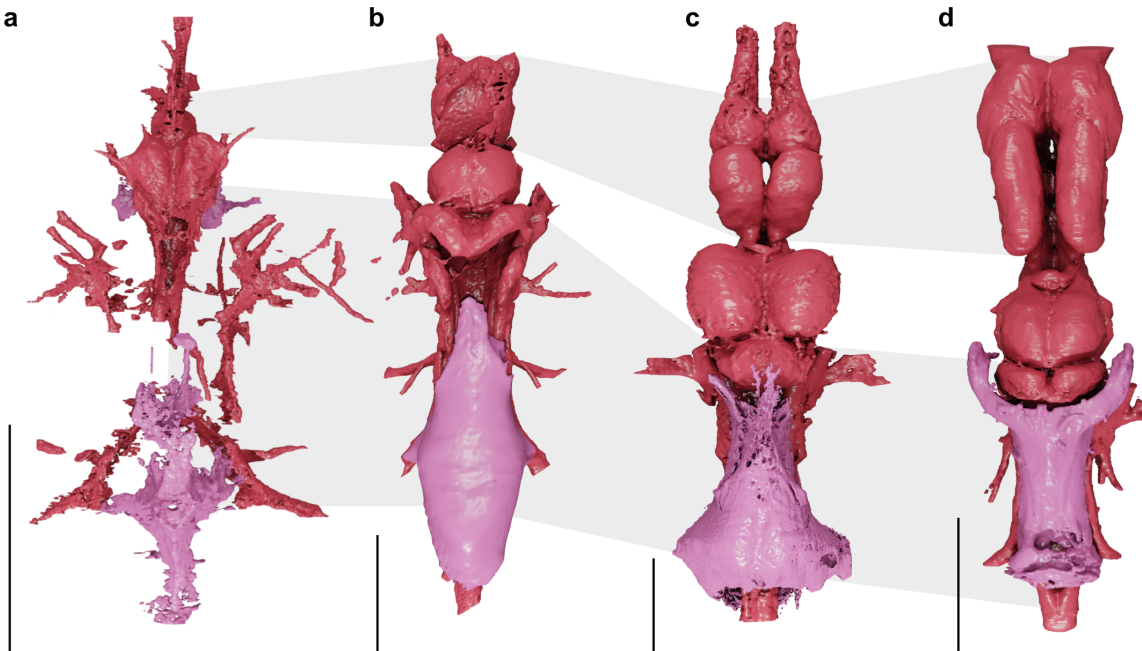

521

522

523

524



525 **Extended Data Fig. 4. Transverse sections and renders of the brain of †*Coccocephalichthys***  
526 ***wildi*. a, b**, the telencephalon. **c, d**, the mesencephalon and hypophysis. cce, corpus cerebellum;  
527 h.inf, inferior lobe of the hypothalamus; hyp, hypophysis; tel, telencephalon; mes,  
528 mesencephalon; ms, mesencephalic sheet; v. tr, velum transversum; 4<sup>th</sup> v, fourth ventricle; II,  
529 optic nerve; III, oculomotor nerve; IV, trochlear nerve, V, trigeminal nerve; VII, facial nerve.  
530 Dorsal portion of forebrain and velum transversum digitally removed in renders. Scale bar in a, c  
531 = 2.5 mm; scale bar in b, d = 5 mm.

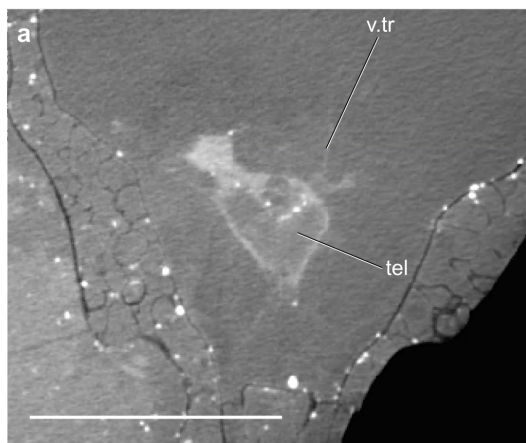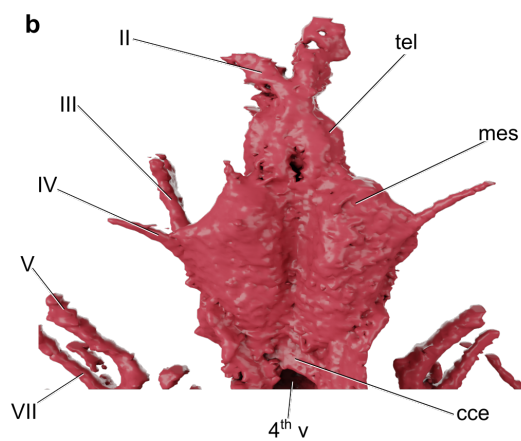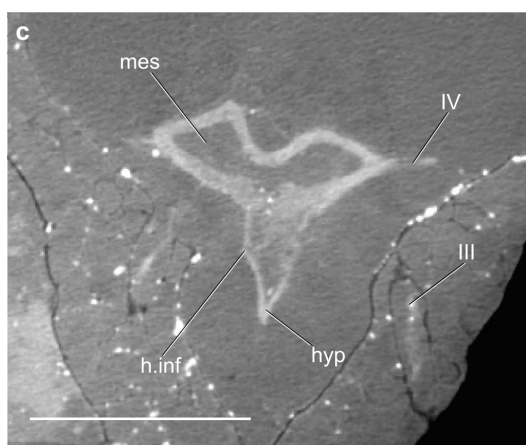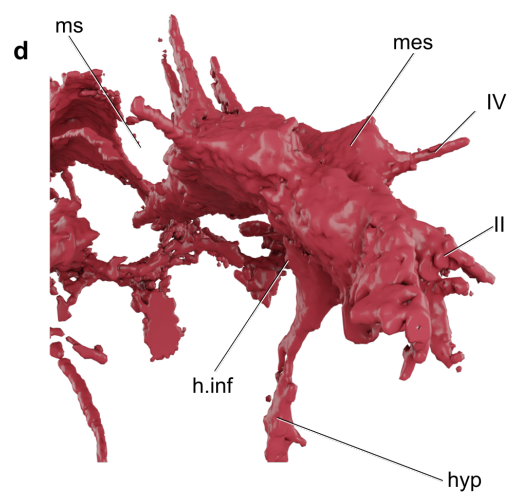

532

533

534

535 **Extended Data Fig. 5. Sections through the brain of †*Coccocephalichthys wildi*.** **a**, transverse  
536 section through the anterior portion of the telencephalon. **b**, axial section through the ventral  
537 portion of the telencephalon. **c**, transverse section through the posterior portion of the  
538 telencephalon. **d**, axial section through the dorsal portion of the telencephalon. **e**, transverse  
539 section through the anterior portion of the hypothalamus inferior lobes. **f**, transverse section  
540 through the posterior portion of the hypothalamus inferior lobes. **h.inf**, inferior lobe of the  
541 hypothalamus; **l.hyp.re**, lateral hypothalamic recess; **tel**, telencephalon; **tel.sept**, telencephalic  
542 septum. Scale bar = 2 mm.

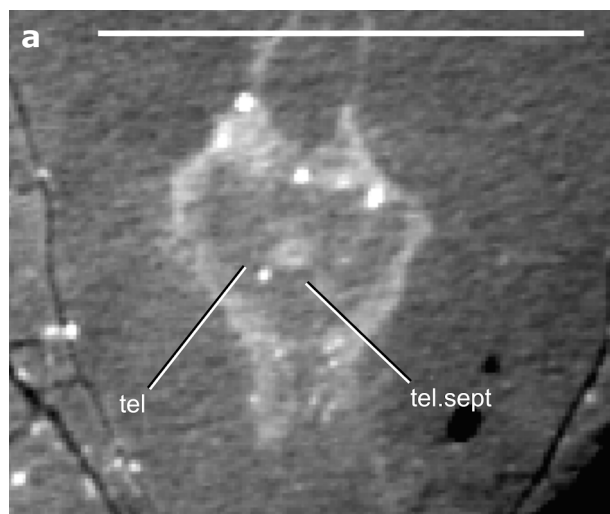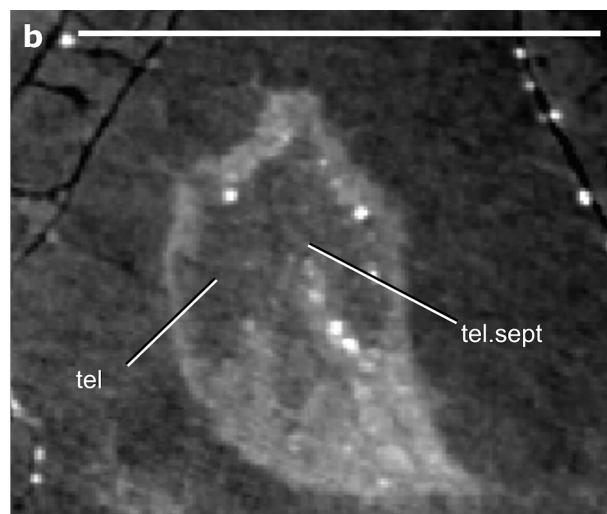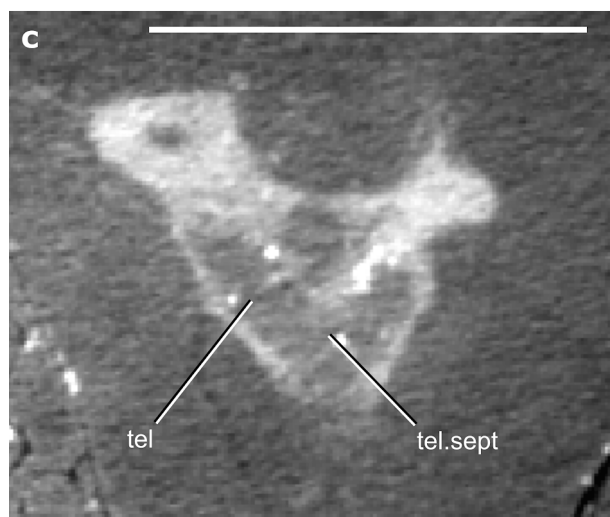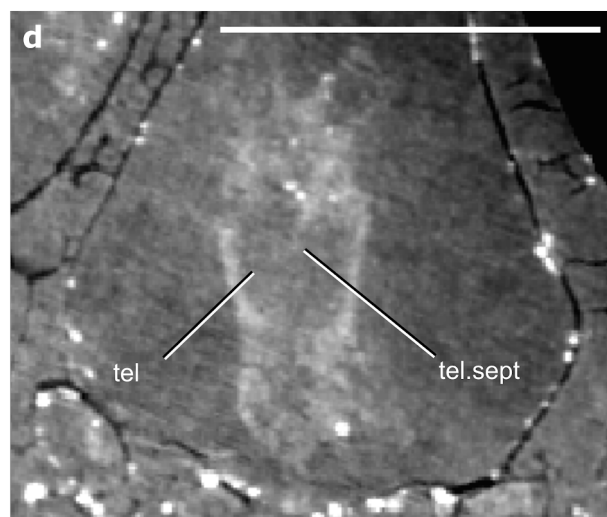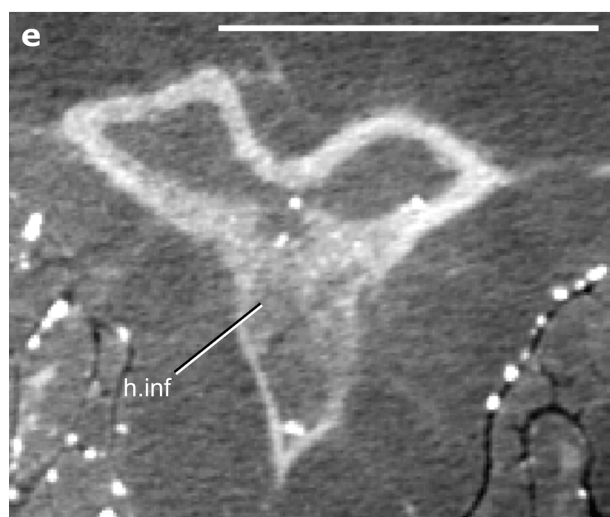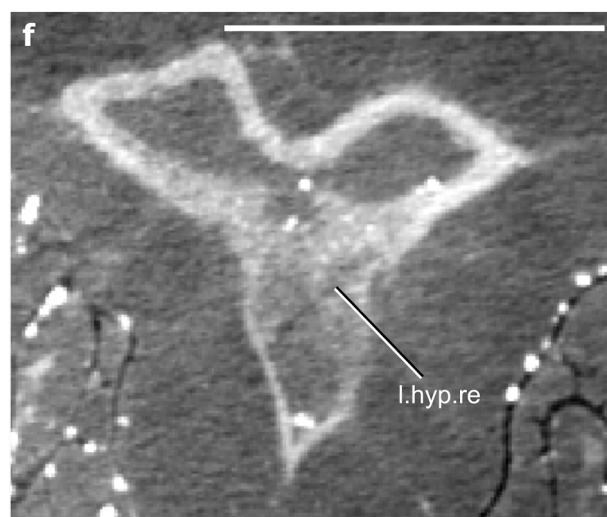

543

544

545 **Extended Data Fig. 6. Sections through the brain of †*Coccocephalichthys wildi* and *Amia***  
546 ***calva*.** **a**, transverse section through the diencephalon and mesencephalon of *Coccocephalichthys*  
547 *wildi*. **b**, transverse section through the diencephalon and mesencephalon of *Amia calva*. l.hyp.re,  
548 lateral hypothalamic recess. Scale bar = 2 mm.

549

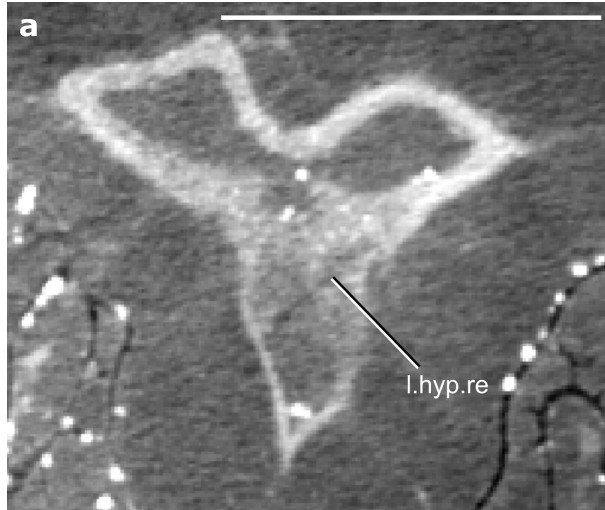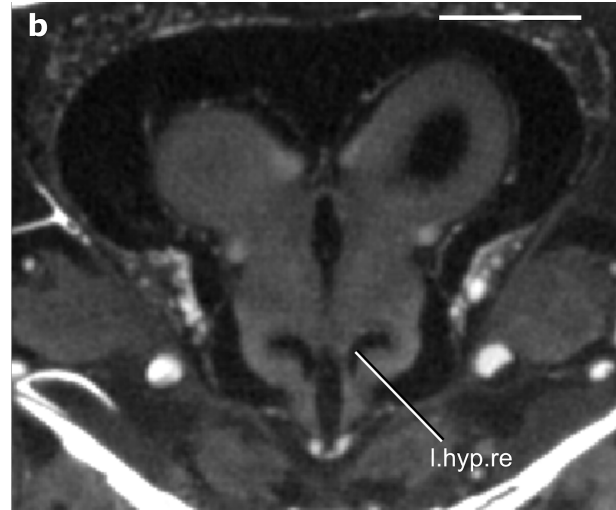

Source: https://www.biorxiv.org/content/10.1101/2022.06.04.492470v1.full.pdf
